# Supplementary material for: Influence of Amino Acid Substitutions in ApoMb on Different Stages of Unfolding of Amyloids
Source: Preprints.org preprint supplement (doi:10.20944/preprints202311.0283.v1), 2023-11-06

The article presents one electrophoregram for ApoMb V10F (Figure 5a).

Gels for WT ApoMb and other mutant variants are not presented in the article, but were used for calculations of the bands intensities.

WT

MW

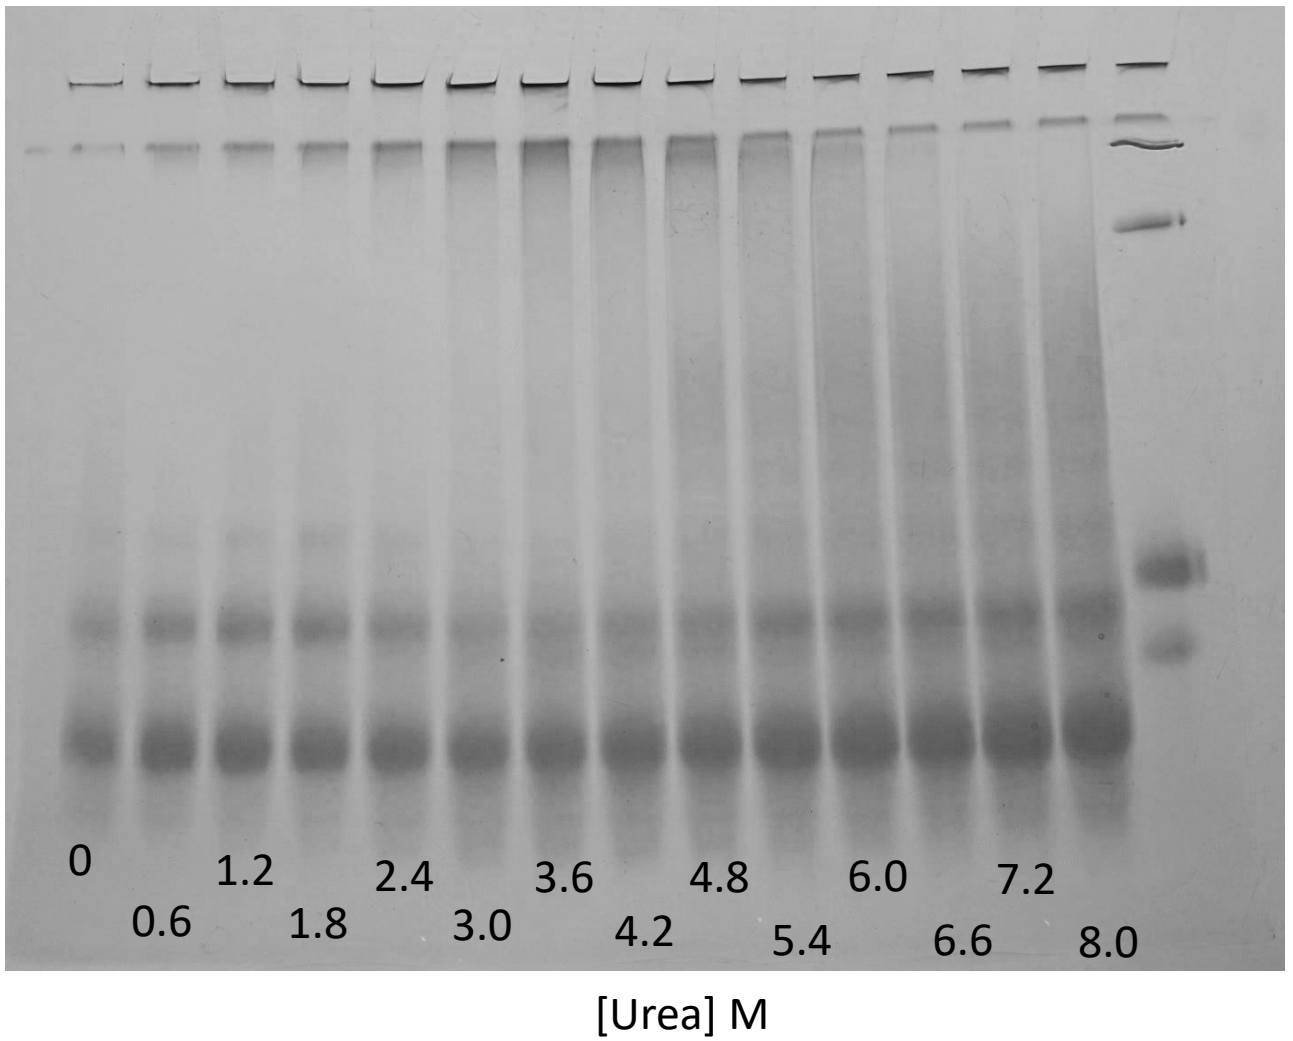

MW

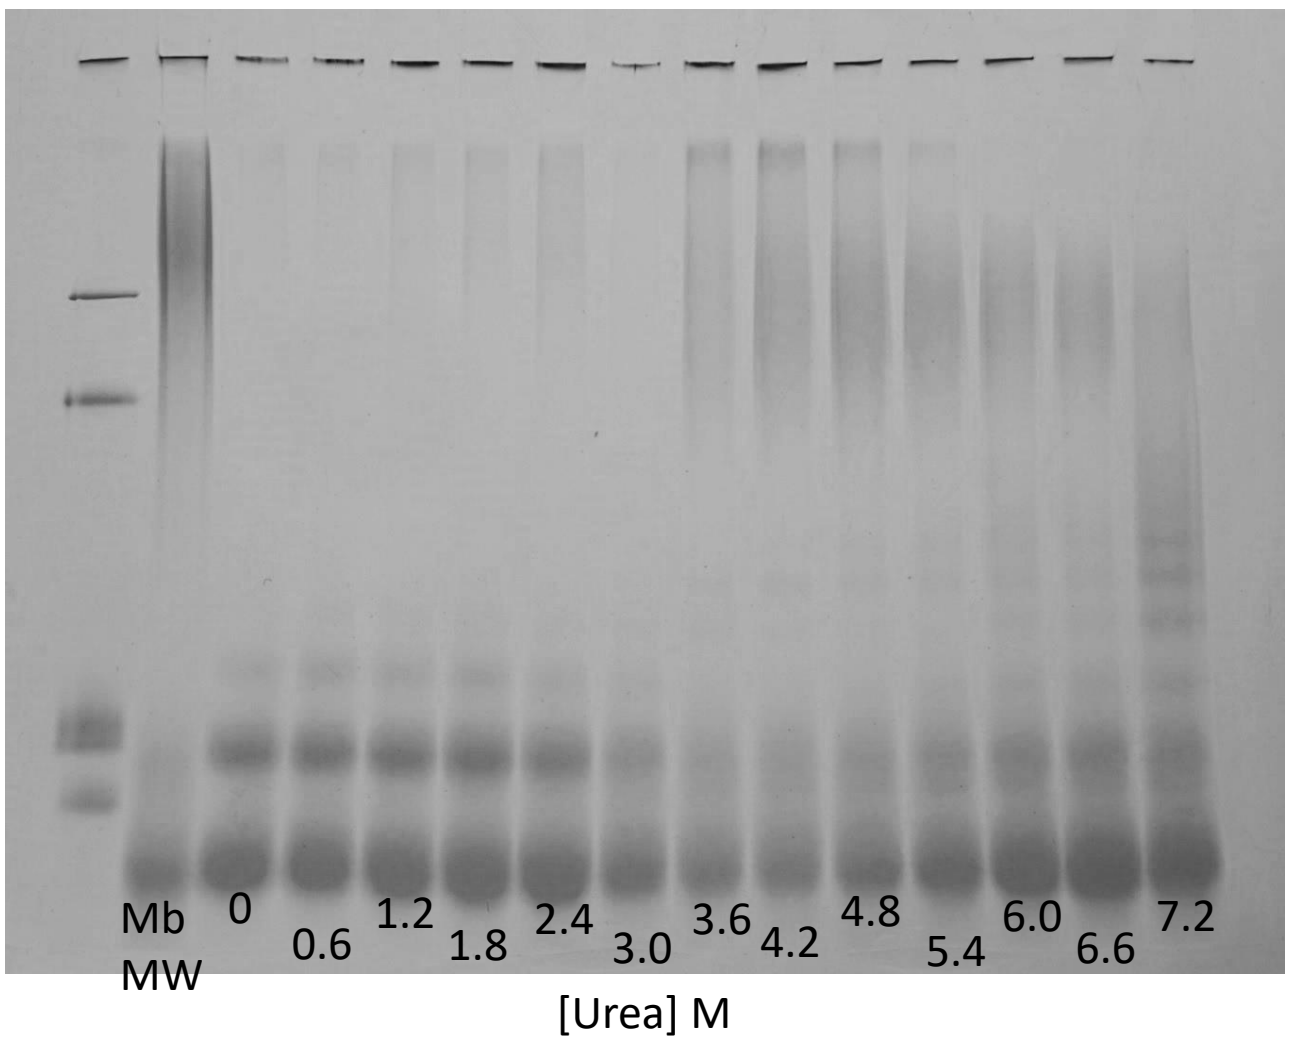

## MW

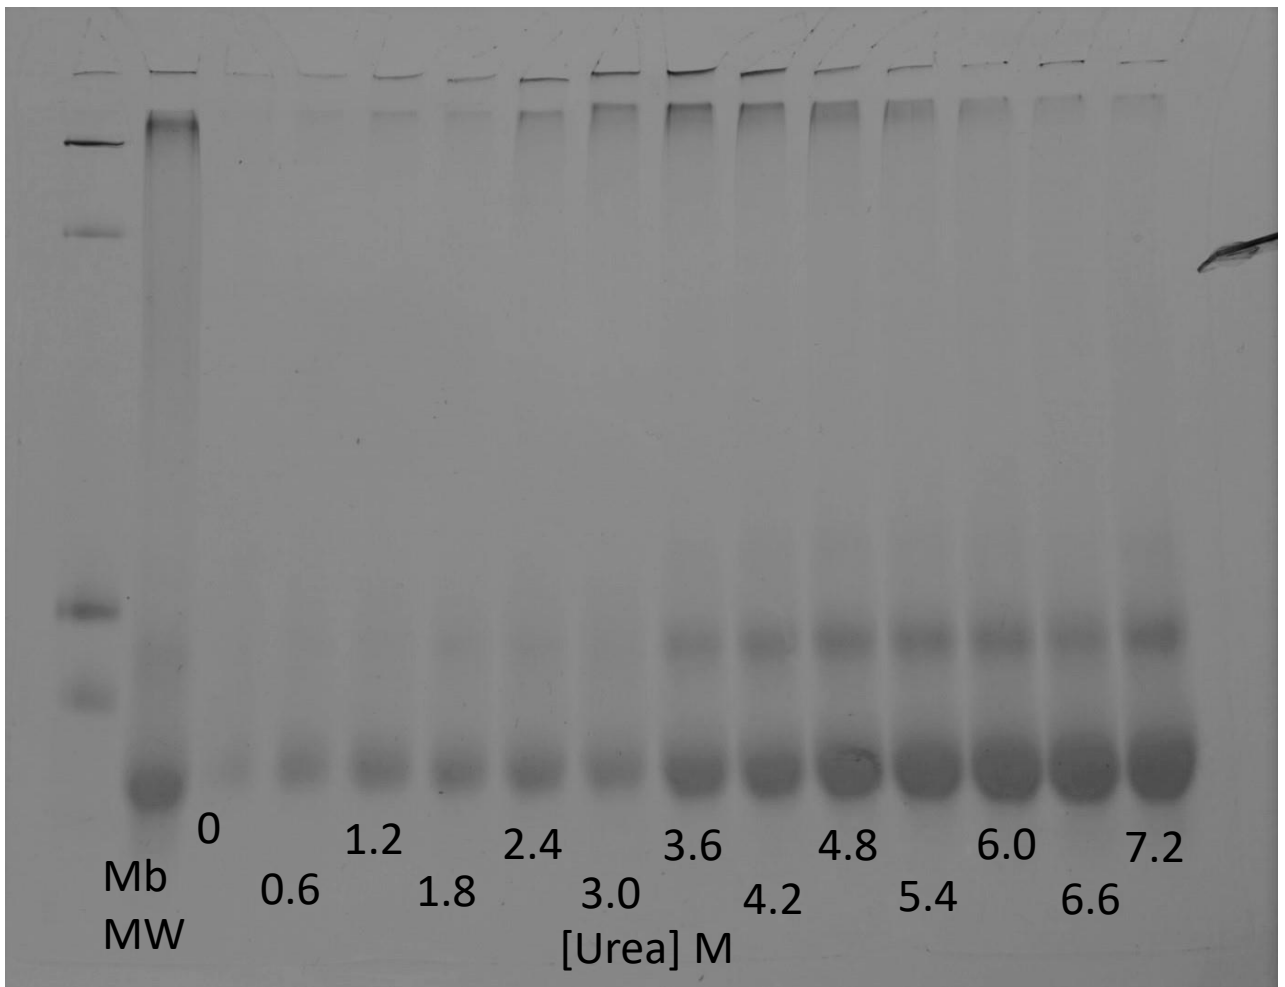

MW

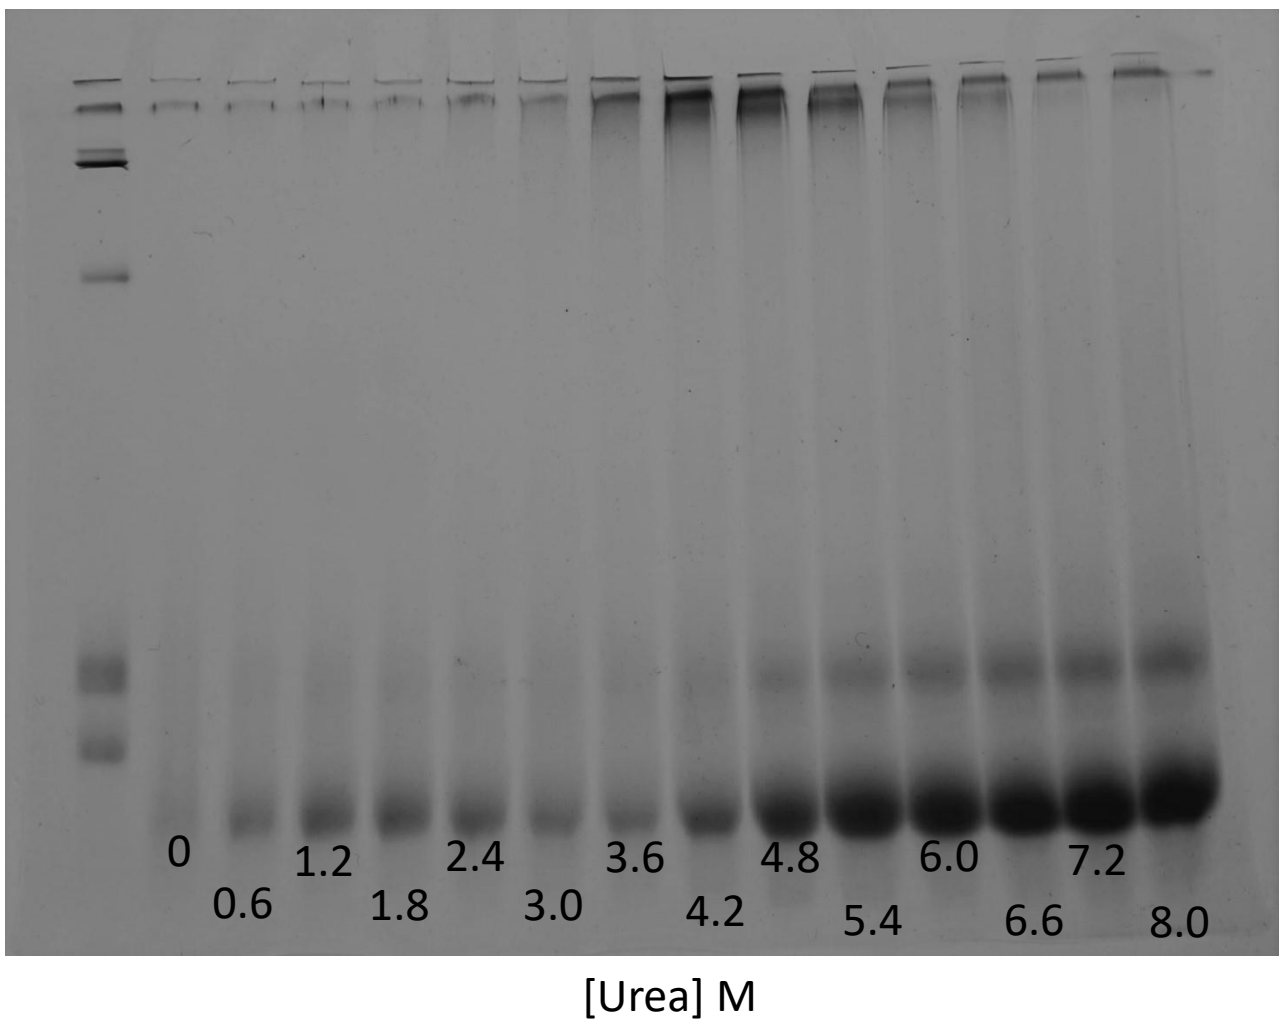

V10F

MW

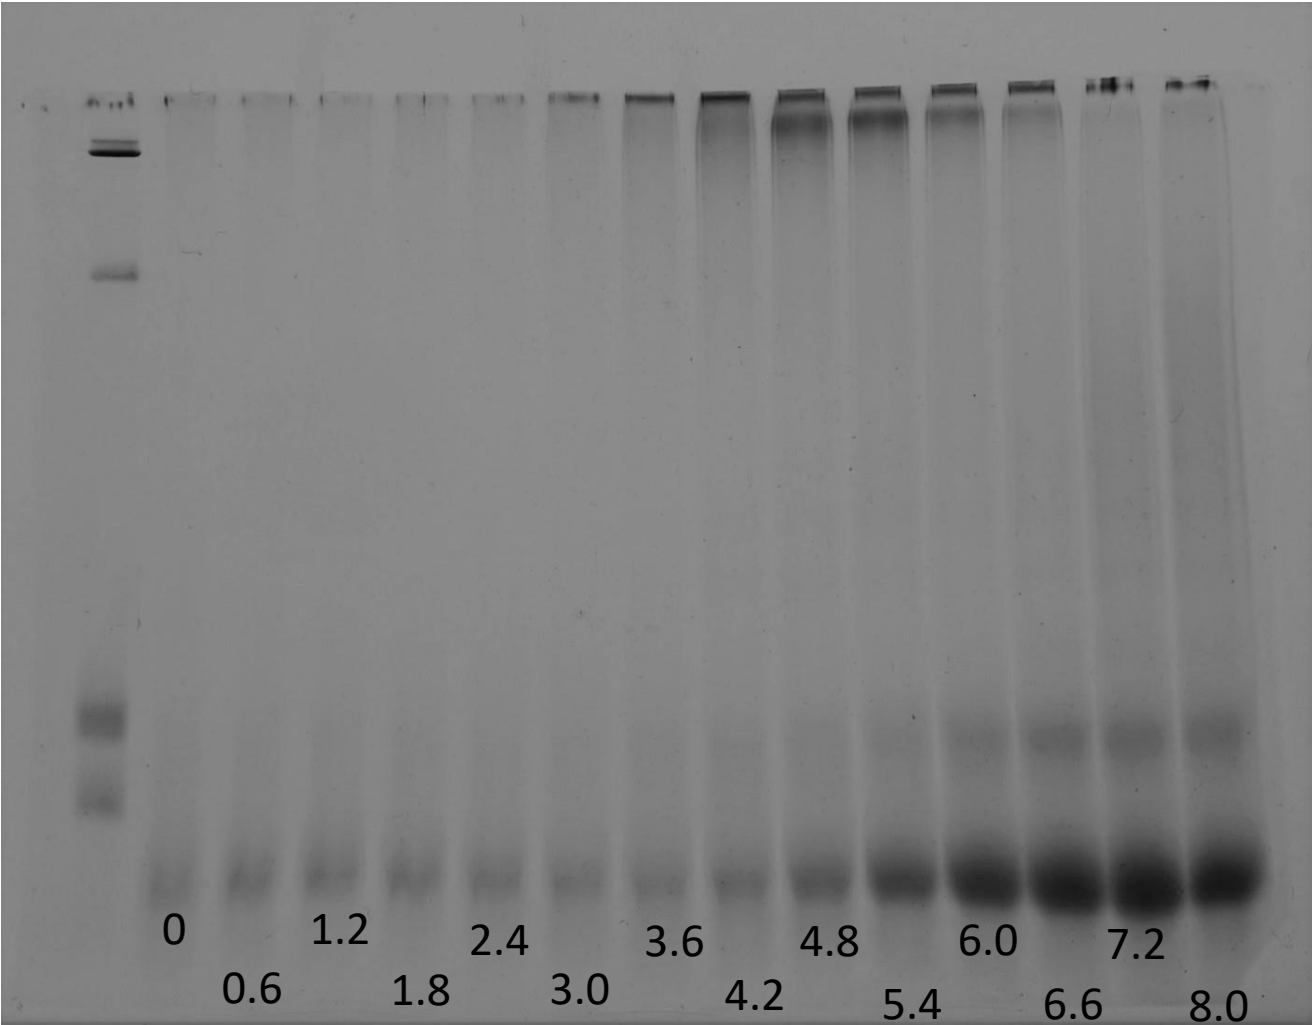

[Urea] M

MW

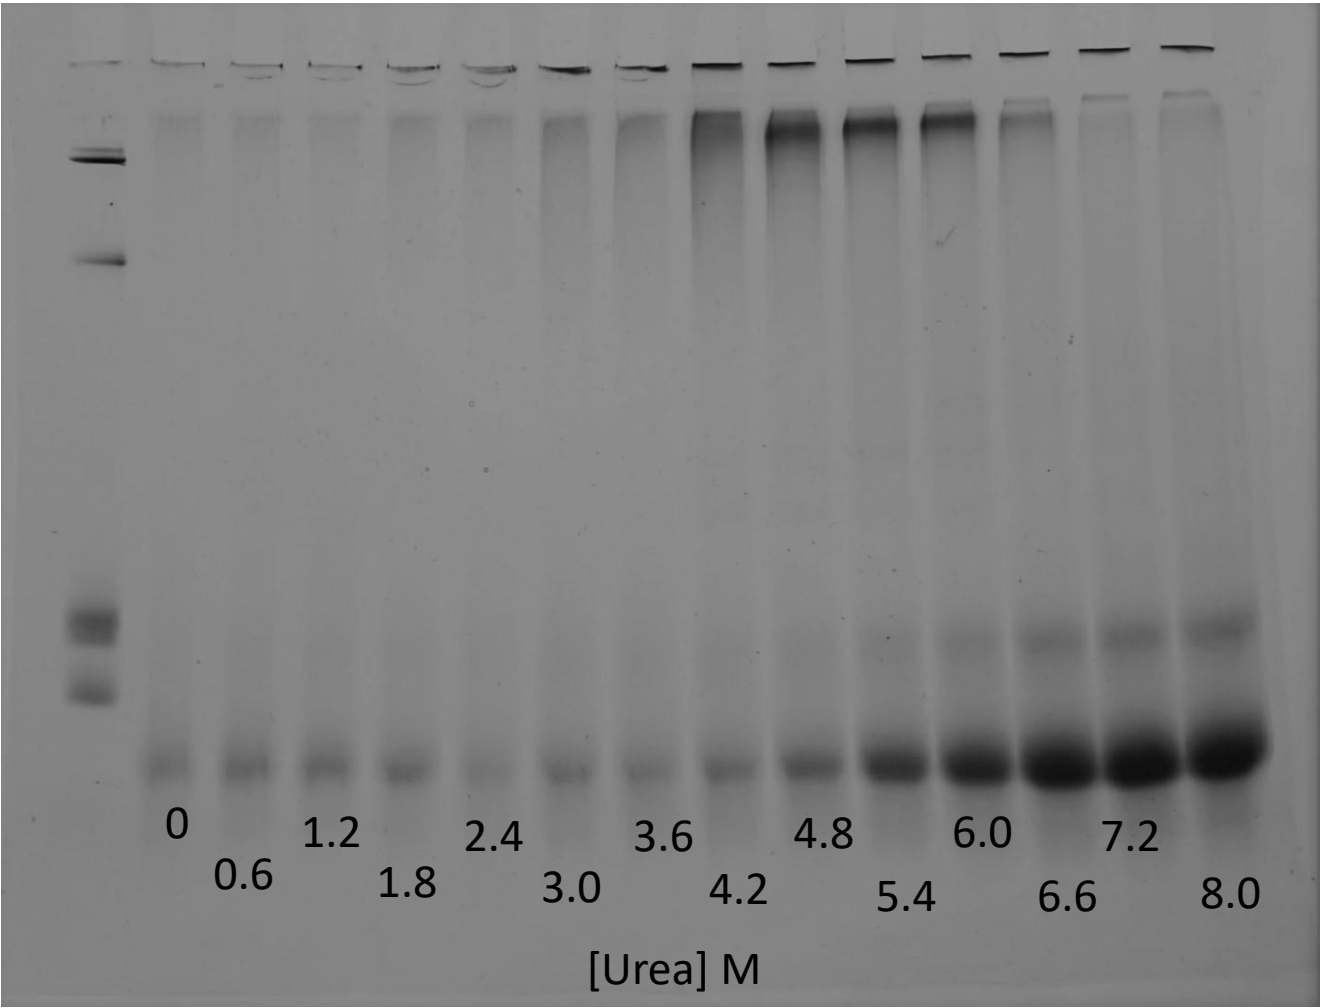

[Urea] M

L115A

MW

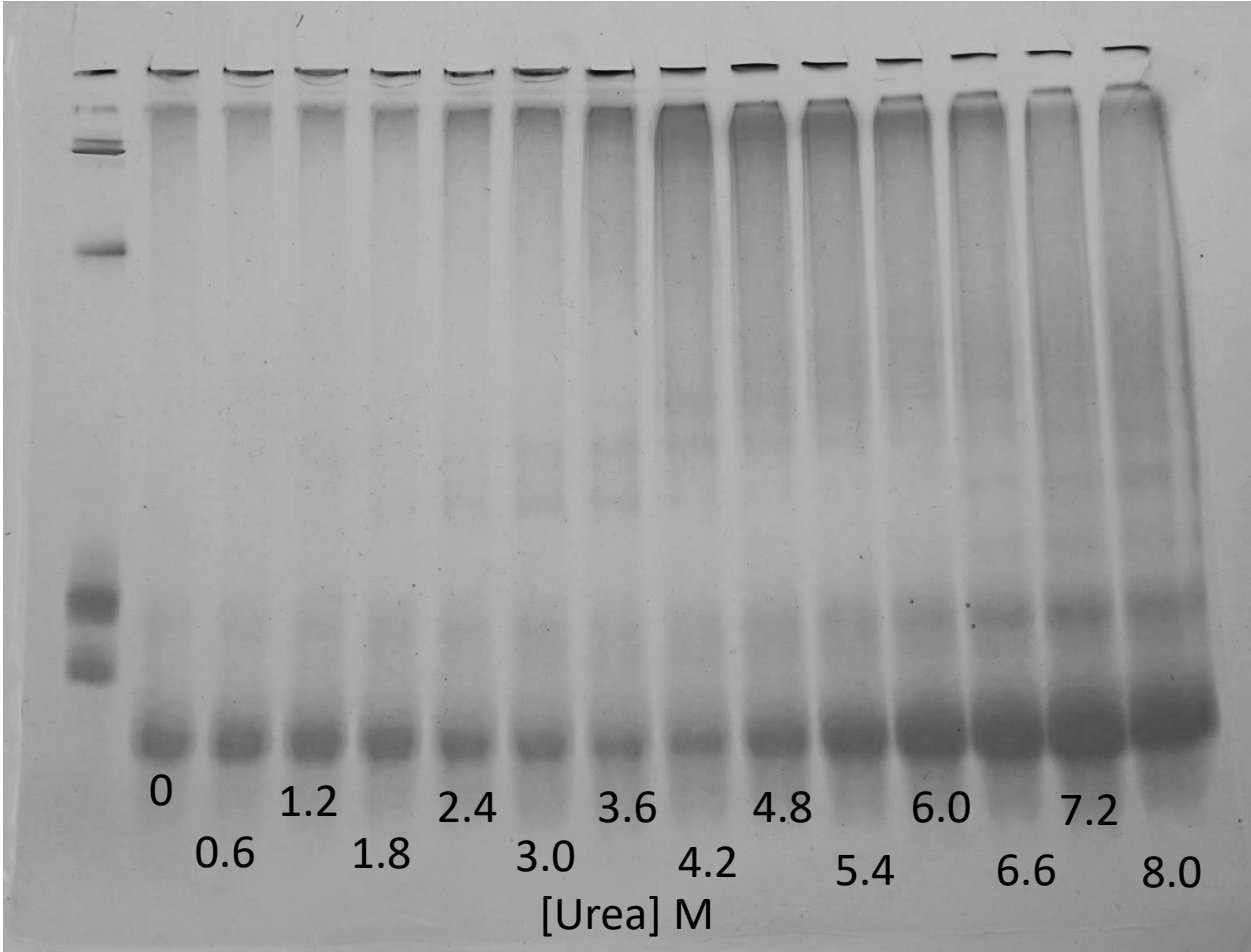

MW

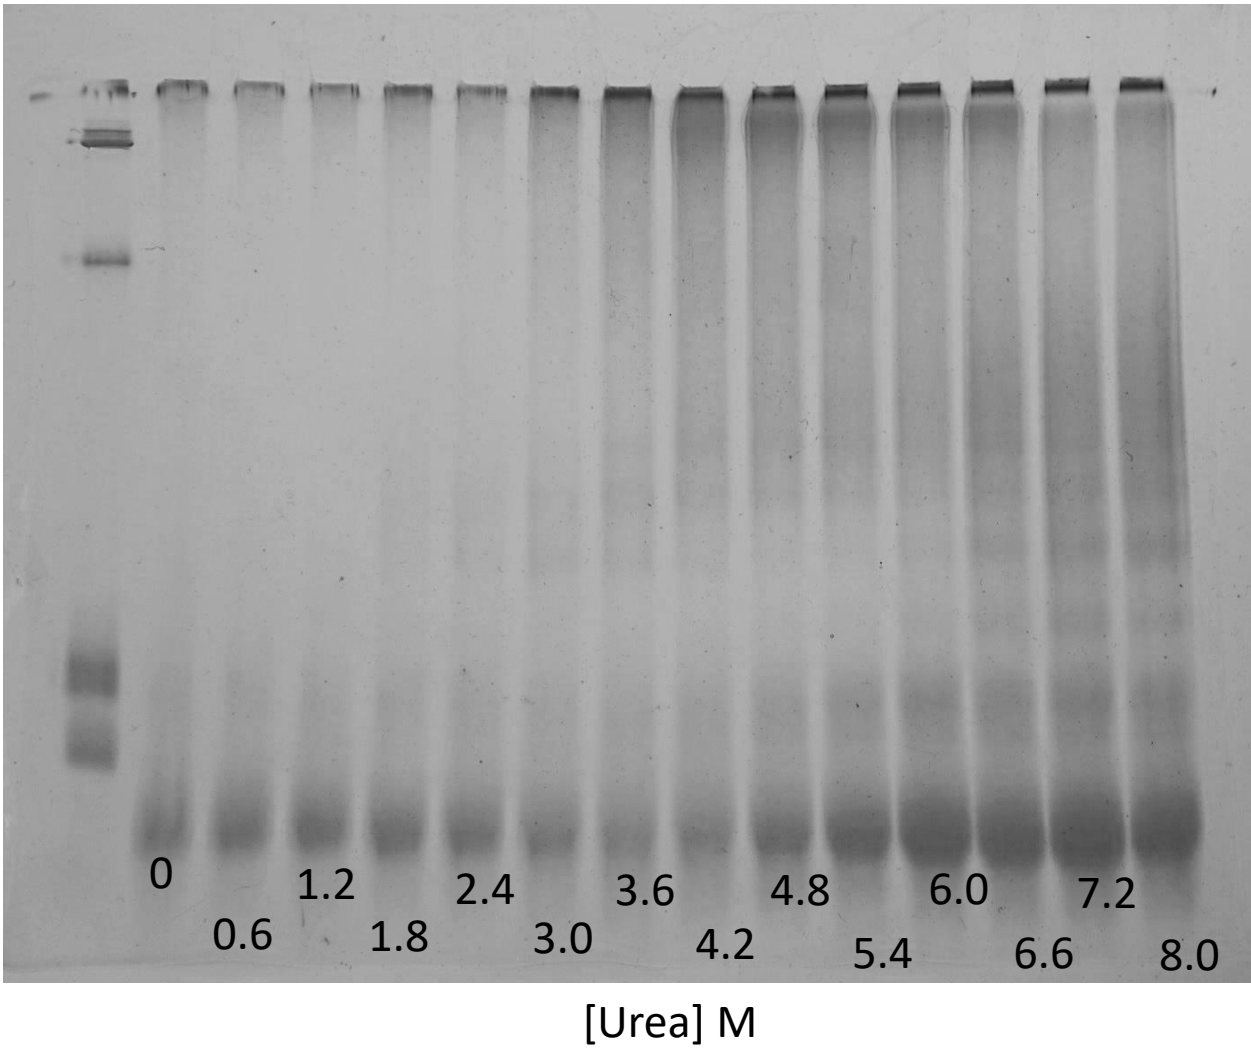

# L115F

MW

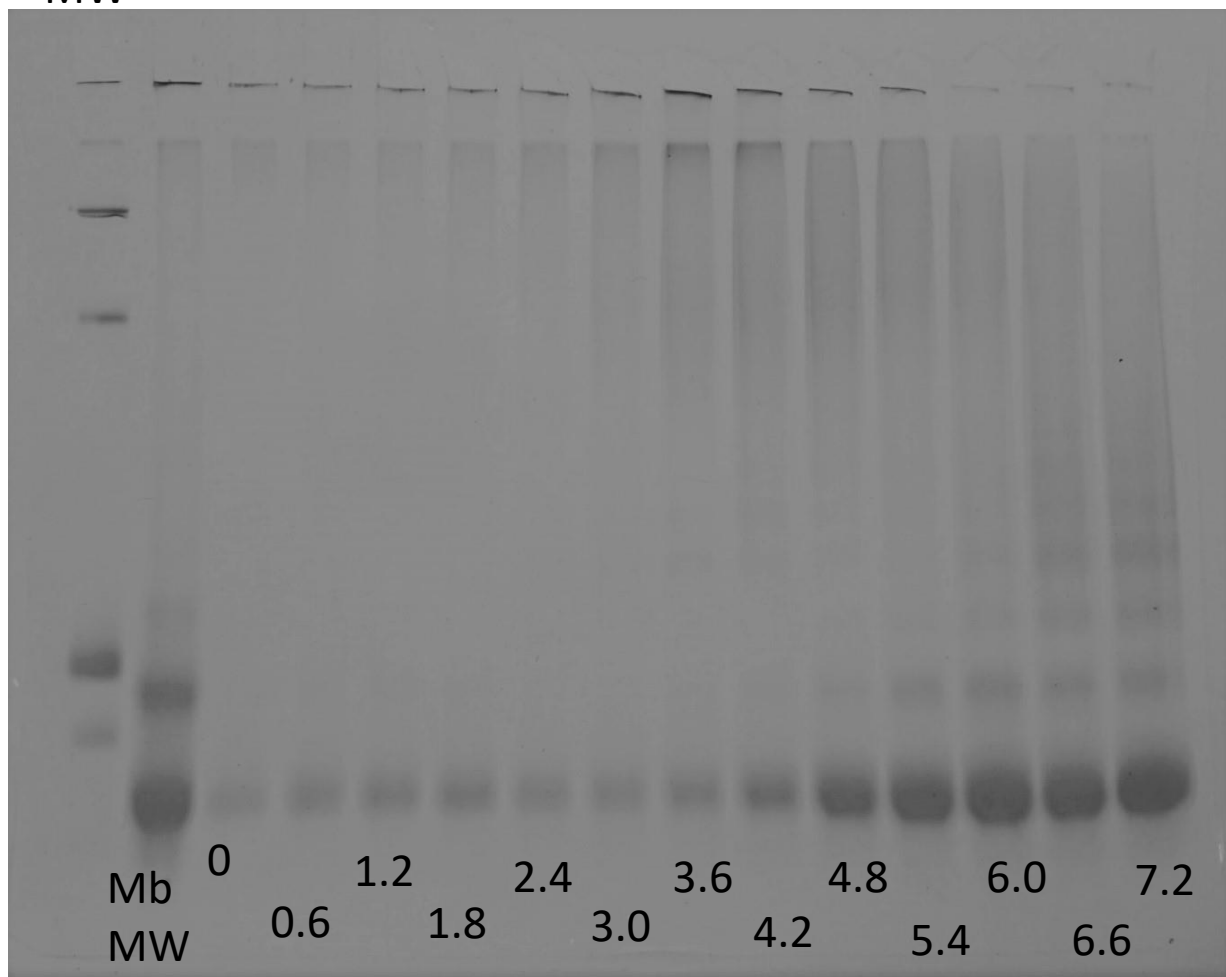

[Urea] M

MW

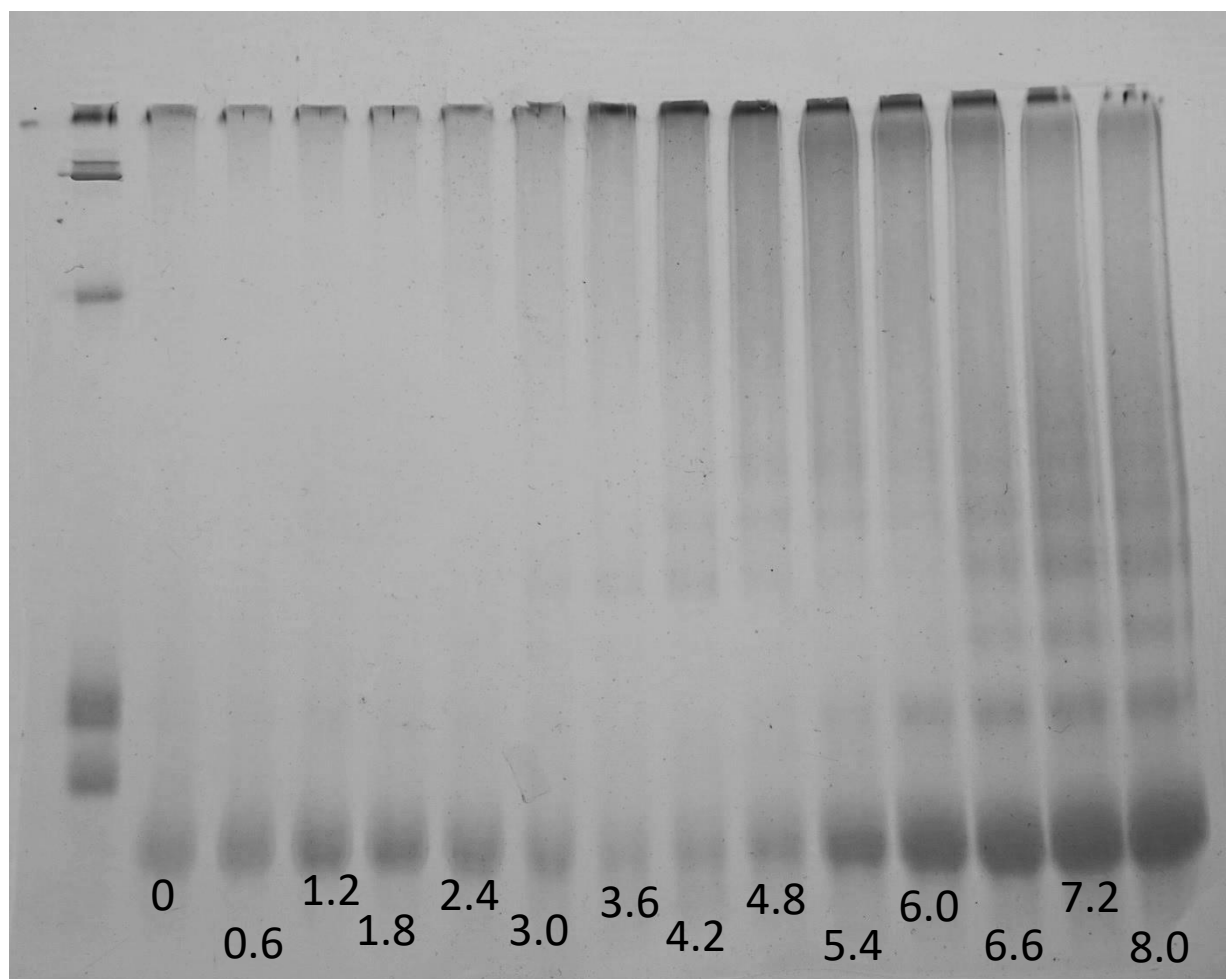

[Urea] M

## M131A

MW

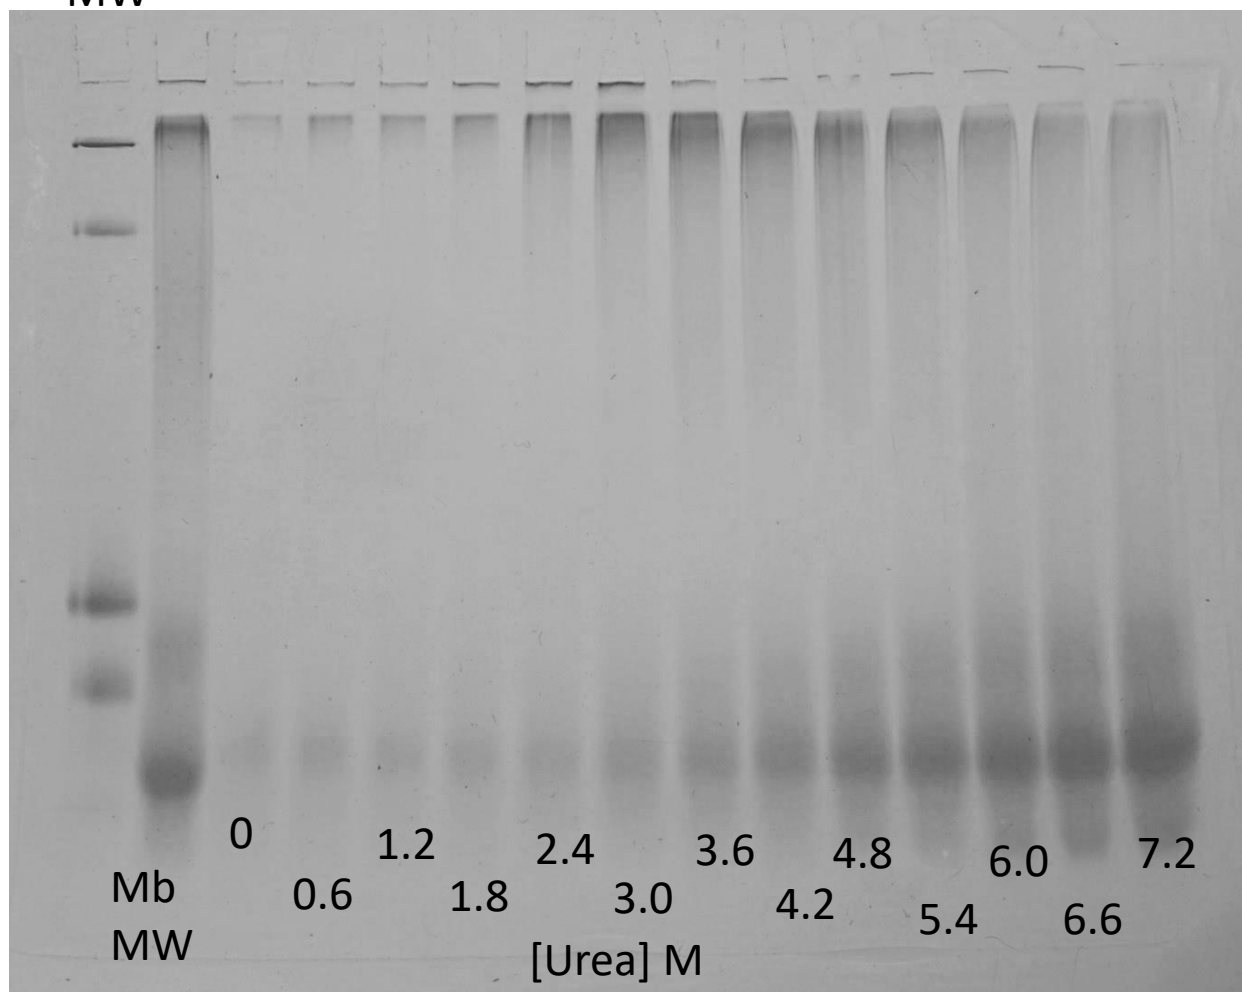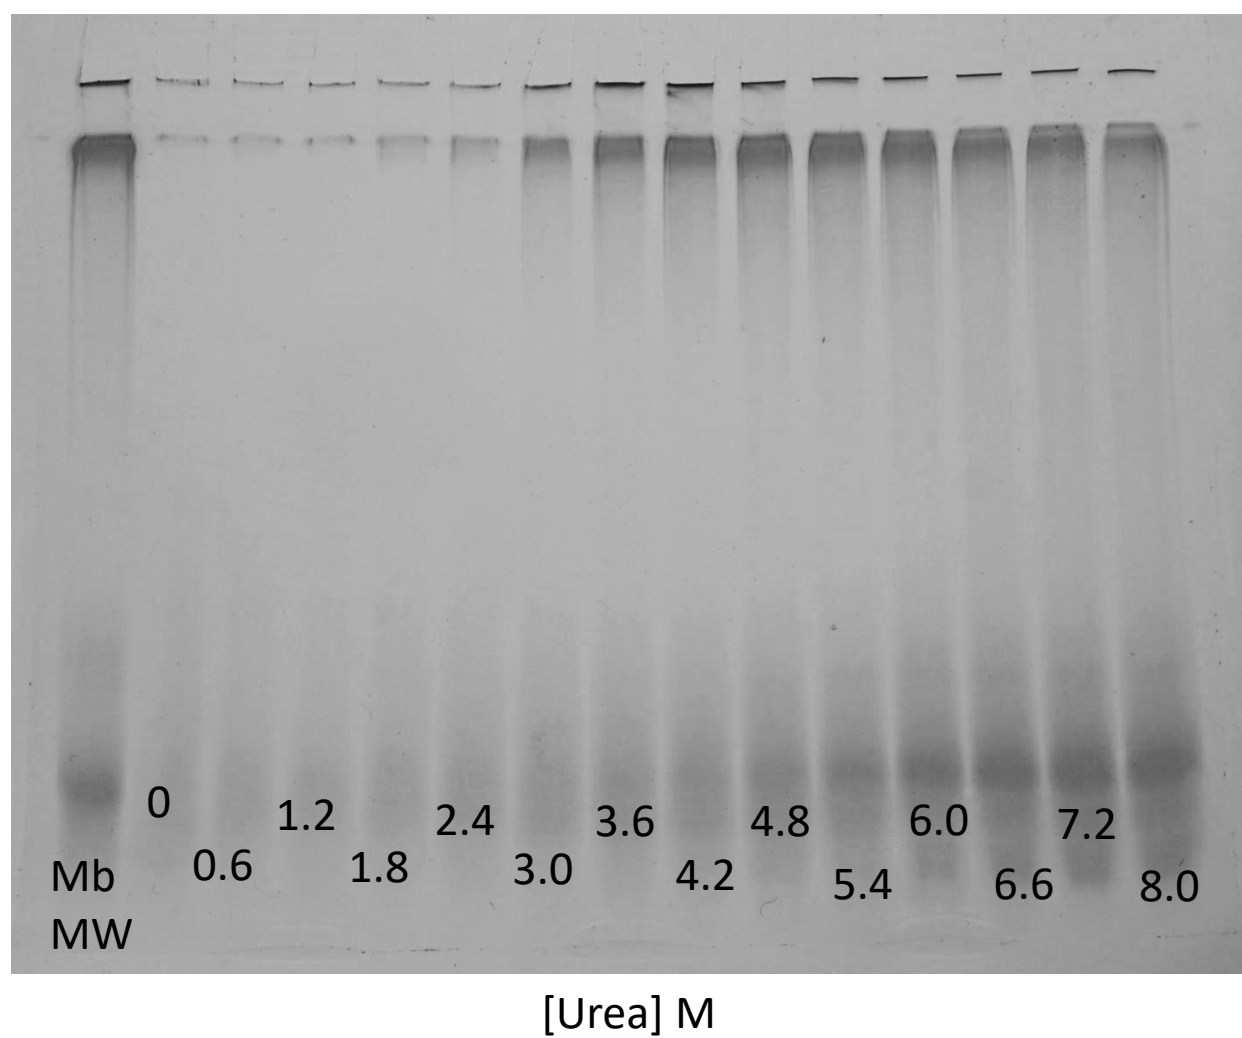

M131W

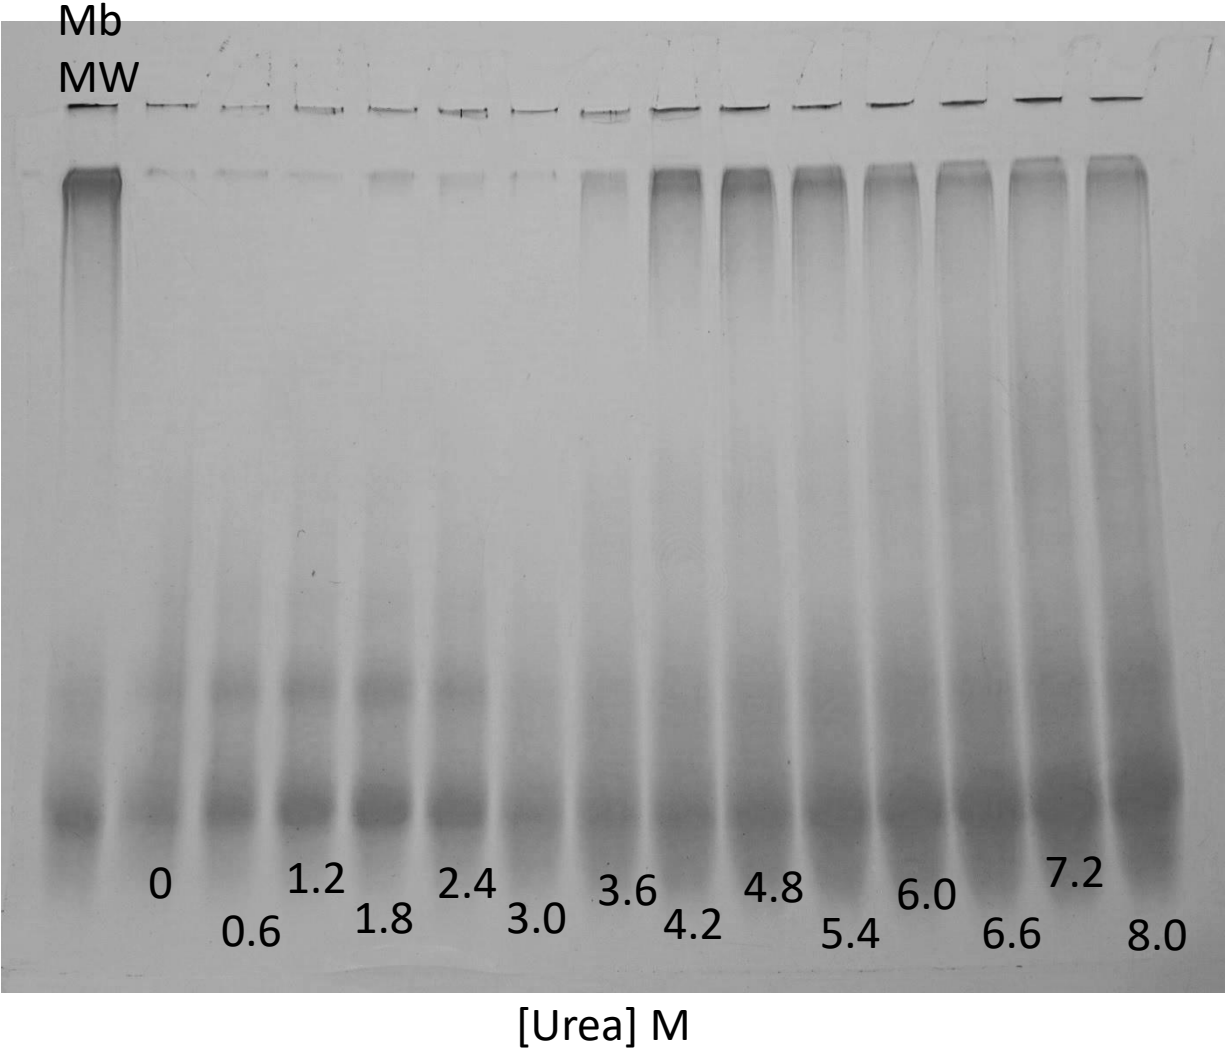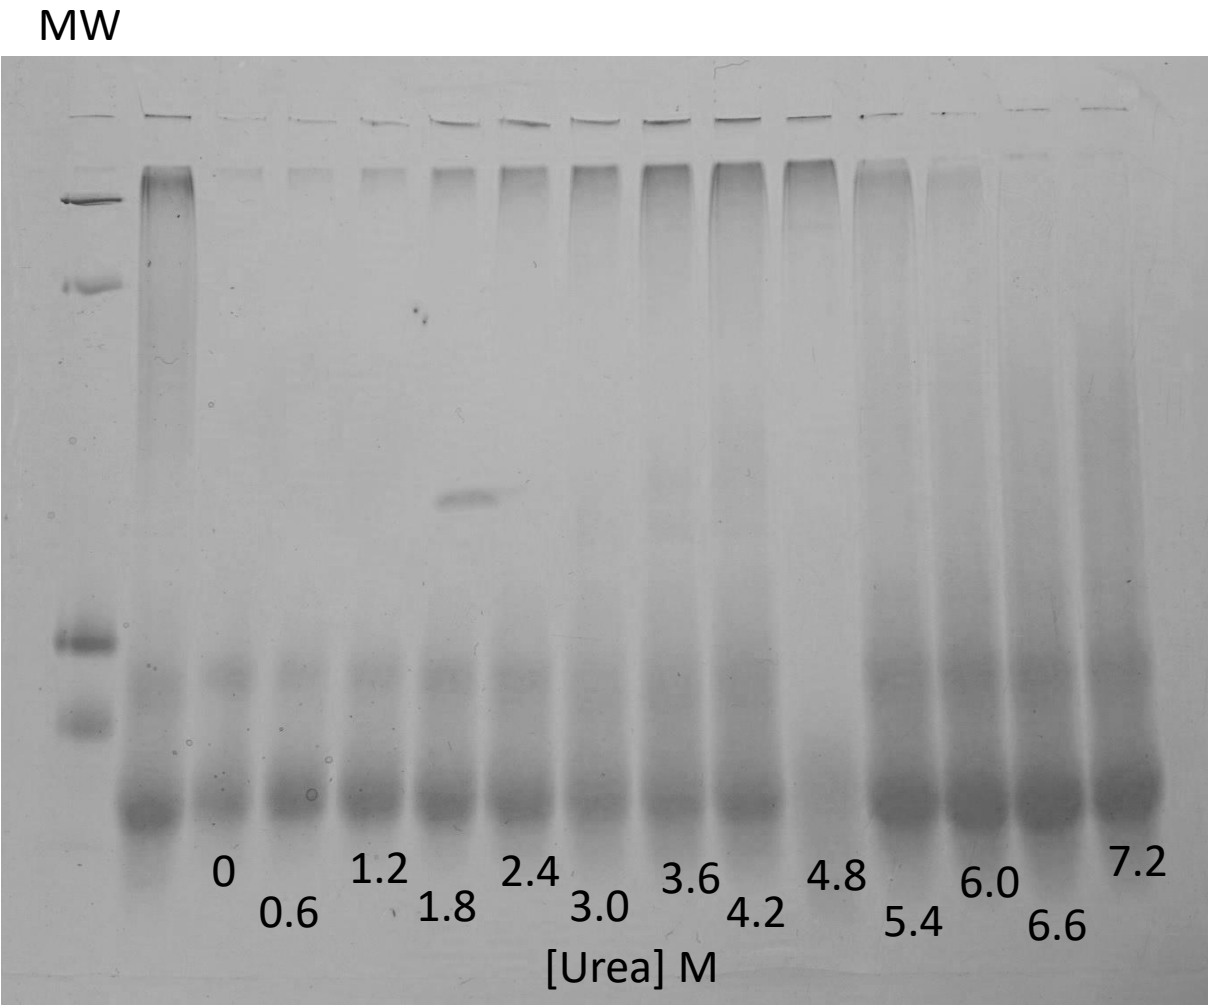

Supplement: Supplementary file 1 [file supplementary]
